# Supplementary material for: Trajectory of the COVID-19 pandemic: chasing a moving target
Source: PubMed Central journal article supplement — Ann Transl Med. 2020 Jun;8(11):694. doi: 10.21037/atm-20-2793 (PMC7327313; doi:10.21037/atm-20-2793), 2020-06
Supplement: atm-08-11-694-prf.pdf [file atm-08-11-694-prf.pdf]

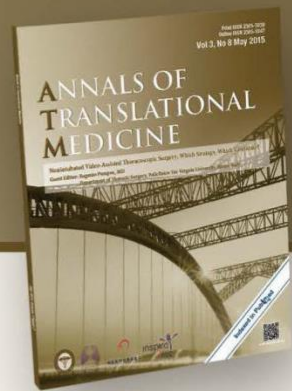

## Peer Review File

Article information: <http://dx.doi.org/10.21037/atm-20-2793>

### Comment 1:

Sounder bibliographical sources may be needed, especially in the core part of the paper “Trajectory of COVID-19 pandemic”. English revision is needed, too. To increase readability, dividing paragraphs using the indentation may be useful.

### Reply 1:

- Bibliography has been updated
- Reviewed and modified sentence formation at appropriate places

### Comment 2:

More in general, I believe authors should expand a bit more the analysis on the different approaches and different results obtained by Asian countries, on one hand, and European countries, on the other, and especially Italy. It could also be stressed the importance of different epidemiological and social backgrounds, with greater emphasis on the excessive number of deaths among older people in Italy.

### Reply 2:

- Thanks for the suggestion. We reviewed the literature and added a section (new table) to discuss the changes variation in mortality rates and factors responsible for that for example testing strategy etc.
- Relevant bibliography added

### Comment 3:

With COVID-19 burden increasing at the global level and the progressive spreading in different national settings, the topic authors focus on is of interest both at the clinical and public health level.

### Reply 3:

Concluding remarks modified to stress on this point.
